# Supplementary material for: Vorapaxar treatment reduces mesangial expansion in streptozotocin-induced diabetic nephropathy in mice
Source: PubMed Central journal article supplement (PMC5955164; doi:10.18632/oncotarget.25069), 2018-04-24
Supplement: oncotarget-09-21655-s001.pdf [file oncotarget-09-21655-s001.pdf]

## Vorapaxar treatment reduces mesangial expansion in streptozotocin-induced diabetic nephropathy in mice

### SUPPLEMENTARY MATERIALS

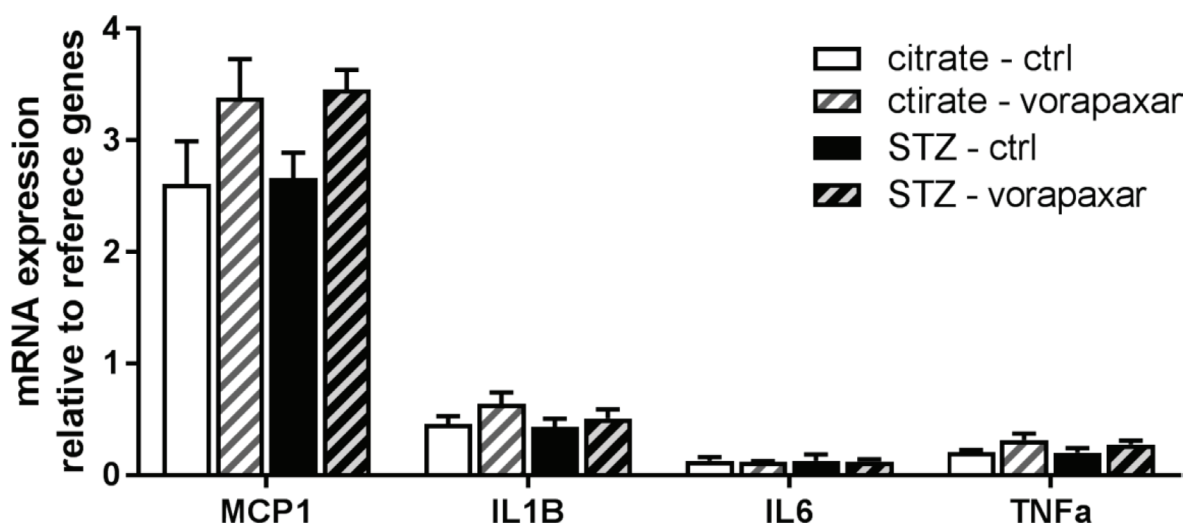

**Supplementary Figure 1: Inflammatory mediators are unchanged upon vorapaxar treatment.** Relative mRNA expression of MCP1, TNF $\alpha$ , IL1 $\beta$  and IL6 in non-diabetic control treated mice (citrate ctrl, white bars), non-diabetic vorapaxar treated mice (citrate vorapaxar, white/grey bars), diabetic control treated mice (STZ ctrl, black bars), and diabetic vorapaxar treated mice (STZ vorapaxar, black/grey bars). Indicated is the mean  $\pm$  SEM.
